# Supplementary material for: Superhydrophobic SiO2-based nanocomposite modified with organic groups as catalyst for selective oxidation of ethylbenzene
Source: Royal Society of Chemistry journal article supplement (doi:10.1039/c4ta00943f), 2014-01-01
Supplement: c4ta00943f1.pdf [file c4ta00943f1.pdf]

## Supporting Information

# Superhydrophobic SiO<sub>2</sub>-based Nanocomposite being Modified with Organic Groups as Catalyst for Selective Oxidation of Ethylbenzene

Chen Chen <sup>a</sup>, Song Shi <sup>a</sup>, Min Wang <sup>a</sup>, Hong Ma <sup>a</sup>, Lipeng Zhou <sup>b</sup>, Jie Xu <sup>a\*</sup>

<sup>a</sup> State Key Laboratory of Catalysis, Dalian National Laboratory for Clean Energy, Dalian Institute of Chemical Physics, Chinese Academy of Sciences, Dalian 116023, P. R. China.

<sup>b</sup> Institute of Catalysis, Department of Chemistry, Zhengzhou University, 100 Kexue Road, Zhengzhou 450001, PR China

E-mail: [xujie@dicp.ac.cn](mailto:xujie@dicp.ac.cn)

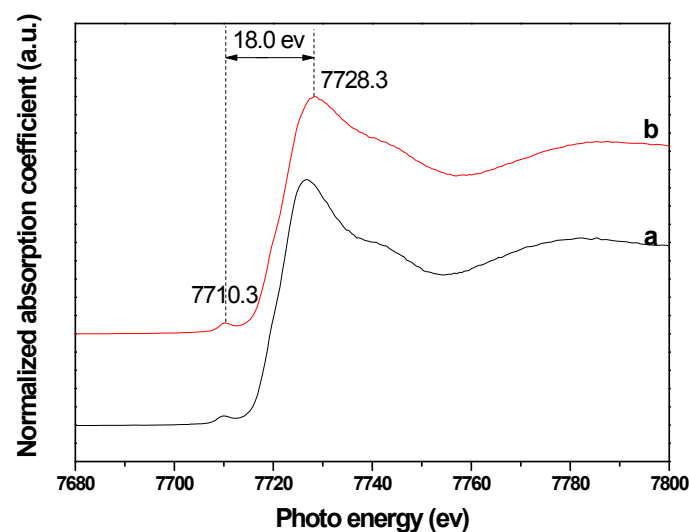

Fig. S1. Co K-edge XANES spectra for (a) Co-SiO<sub>2</sub> and (b) Pr-Co-SiO<sub>2</sub>

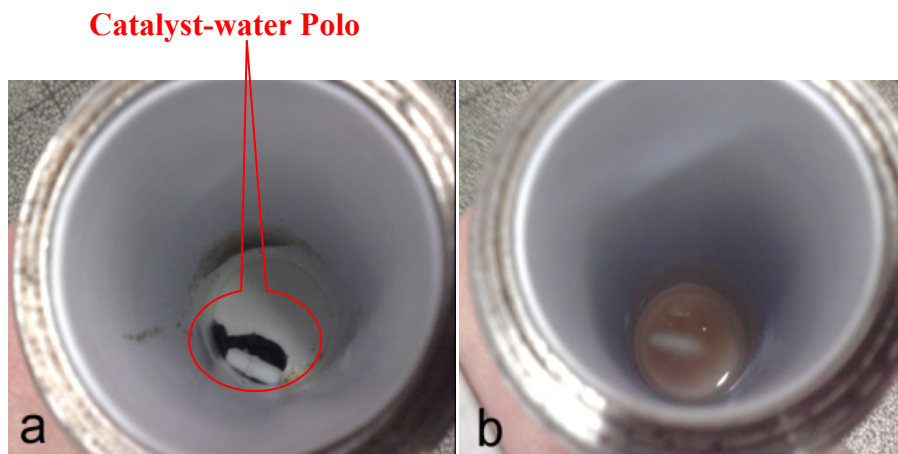

Fig. S2. Comparison of reaction mixture after catalytic reaction with hydrophilic Co-SiO<sub>2</sub> (a) and surperhydrophobic Pr-Co-SiO<sub>2</sub> (b) as catalyst, respectively

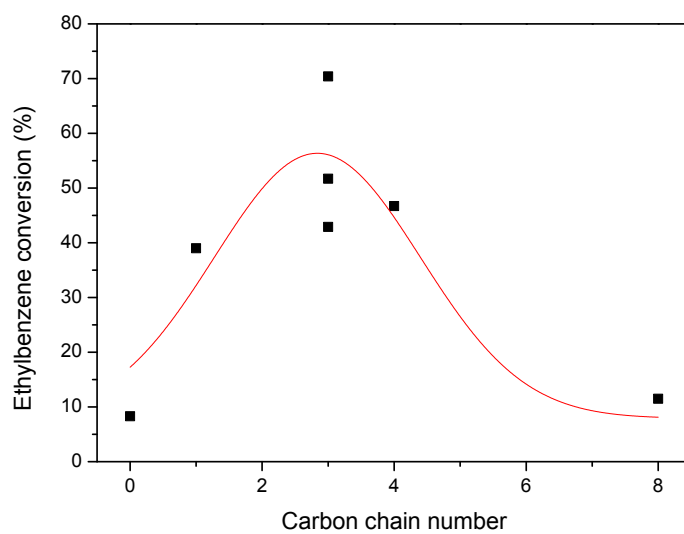

Fig. S3. Relationship between ethylbenzene conversion and carbon chain number of the organic groups

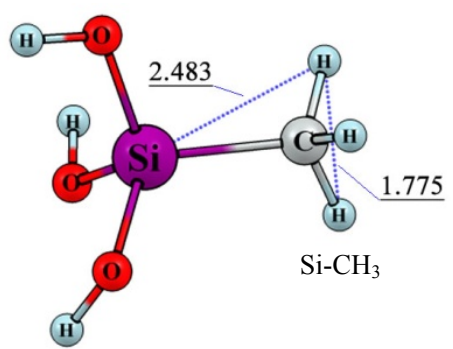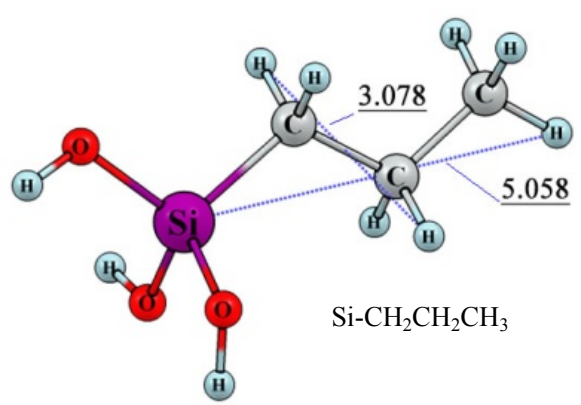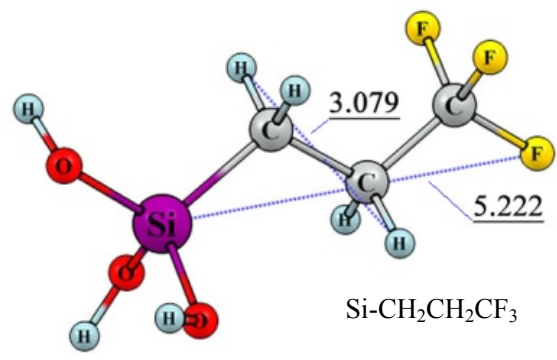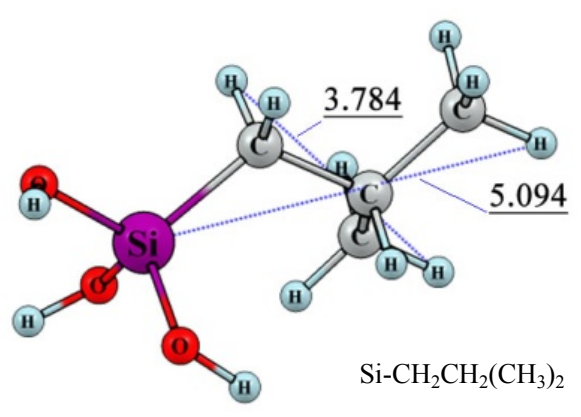

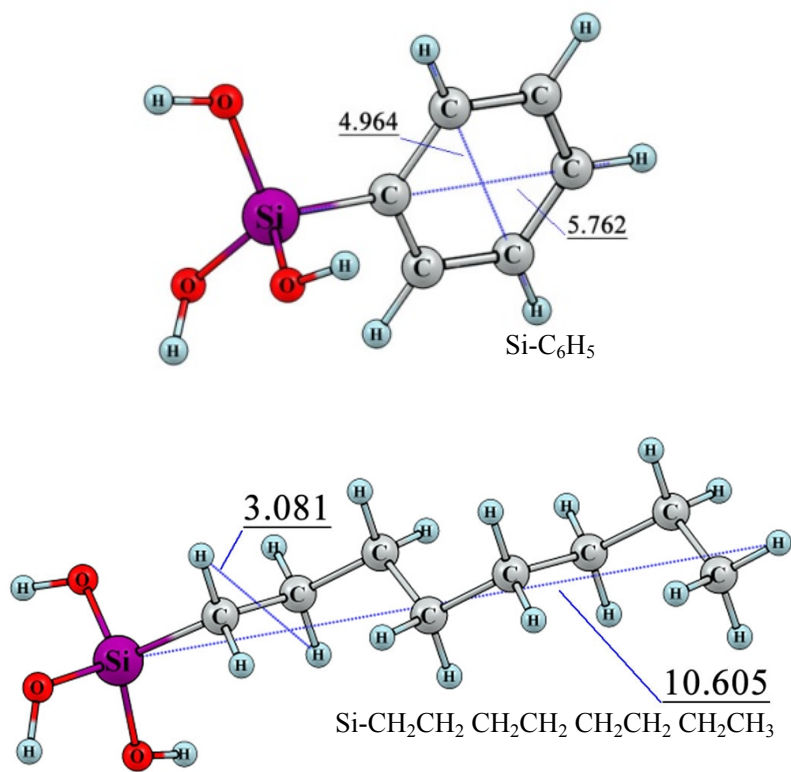

Fig. S4. Geometric information of different organic groups bonding on the surface of  $\text{SiO}_2$ .

**Table S1.** Catalytic performance of Pr-Co-SiO<sub>2</sub> and various reported catalytic system in literature for selective oxidation of ethylbenzene

| Catalyst                        | Temp. (K) | Time (h) | O <sub>2</sub> Pressure (MPa) | Solvent            | Conv. (%) | Selectivity of Main Products |               | Ref.         |
|---------------------------------|-----------|----------|-------------------------------|--------------------|-----------|------------------------------|---------------|--------------|
|                                 |           |          |                               |                    |           | Ketone                       | Alcohol       |              |
| Pr-Co-SiO <sub>2</sub>          | 393       | 6        | 1.0                           | -                  | 70.4      | 87.5                         | 6.4           | Present work |
| Mn-MgAl hydrotalcite            | 408       | 5        | 1.0                           | -                  | 50.3      | 96.7                         | Not Mentioned | 54           |
| Cobalt(III) Pyridinecarboxamide | 423       | 8        | 1.6                           | -                  | 70.8      | 86.1                         | 1.5           | 48           |
| Cobalt(III) Pyridinecarboxamide | 393       | 4        | 1.6                           | -                  | 49.8      | 88.0                         | 9.3           | 48           |
| Carbon nanotube                 | 428       | 4        | 1.5                           | CH <sub>3</sub> CN | 38.2      | 60.9                         | 9.8           | 9            |
| Co/SBA-15                       | 393       | 6        | 1.0                           | -                  | 37.3      | 74.3                         | 19.0          | 11           |
| MnS-1                           | 383       | 6        | 1.0                           | -                  | 33        | 87                           | 13            | 55           |
| DACAQ/NHPI/HY                   | 353       | 10       | 0.3                           | CH <sub>3</sub> CN | 66.2      | 95.8                         | 4.2           | 56           |
| DDQ/NHPI                        | 353       | 6        | 0.3                           | CH <sub>3</sub> CN | 59.3      | 88.2                         | 6.2           | 57           |
